# Supplementary material for: Exploration of natural red-shifted rhodopsins using a machine learning-based Bayesian experimental design
Source: PubMed Central journal article supplement (PMC7979833; doi:10.1038/s42003-021-01878-9), 2021-03-19
Supplement: 42003_2021_1878_MOESM1_ESM.pdf [file 42003_2021_1878_MOESM1_ESM.pdf]

**Supplementary Information:**

**Exploration of natural red-shifted rhodopsins using a machine learning-  
based Bayesian experimental design**

Keiichi Inoue\*, Masayuki Karasuyama, Ryoko Nakamura, Masae Konno, Daichi Yamada,

Kentaro Mannen, Takashi Nagata, Yu Inatsu, Hiromu Yawo, Kei Yura, Oded Béjà, Hideki

Kandori, Ichiro Takeuchi\*

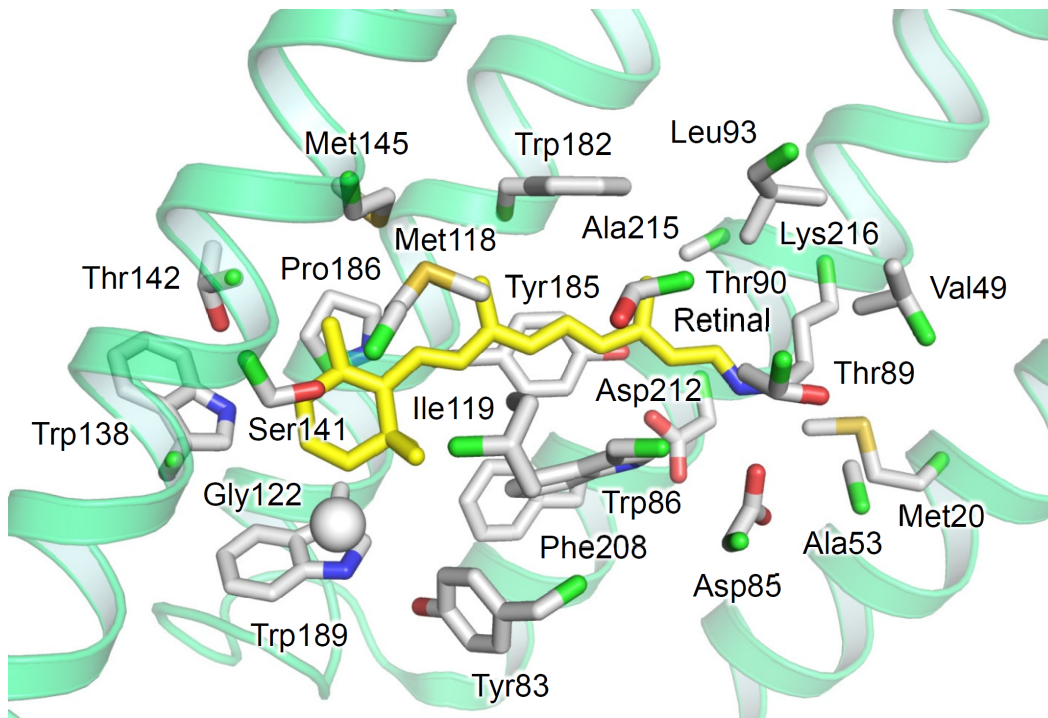

|               |        |        |        |        |        |        |        |        |
|---------------|--------|--------|--------|--------|--------|--------|--------|--------|
| <i>i</i>      | 1      | 2      | 3      | 4      | 5      | 6      | 7      | 8      |
| Residue in BR | Met20  | Val49  | Ala53  | Tyr83  | Asp85  | Trp86  | Thr89  | Thr90  |
| <i>i</i>      | 9      | 10     | 11     | 12     | 13     | 14     | 15     | 16     |
| Residue in BR | Leu93  | Met118 | Ile119 | Gly122 | Trp138 | Ser141 | Thr142 | Met145 |
| <i>i</i>      | 17     | 18     | 19     | 20     | 21     | 22     | 23     | 24     |
| Residue in BR | Trp182 | Tyr185 | Pro186 | Trp189 | Phe208 | Asp212 | Ala215 | Lys216 |

**Supplementary Figure 1. Amino acid residues around the retinal chromophore.** The structure of the 24 amino acid residues around the retinal used in the current ML model in the X-ray crystallographic structure of BR (PDB ID: 1IW6 (Matsui et al. *J. Mol. Biol.* (2002) 324, pp. 469–481)). The C $\alpha$  atom of Gly122 is shown as a white sphere. For clarity, the ribbon models of helices B, C, and E were omitted. The table lists the residue numbers and names of each residue in BR.

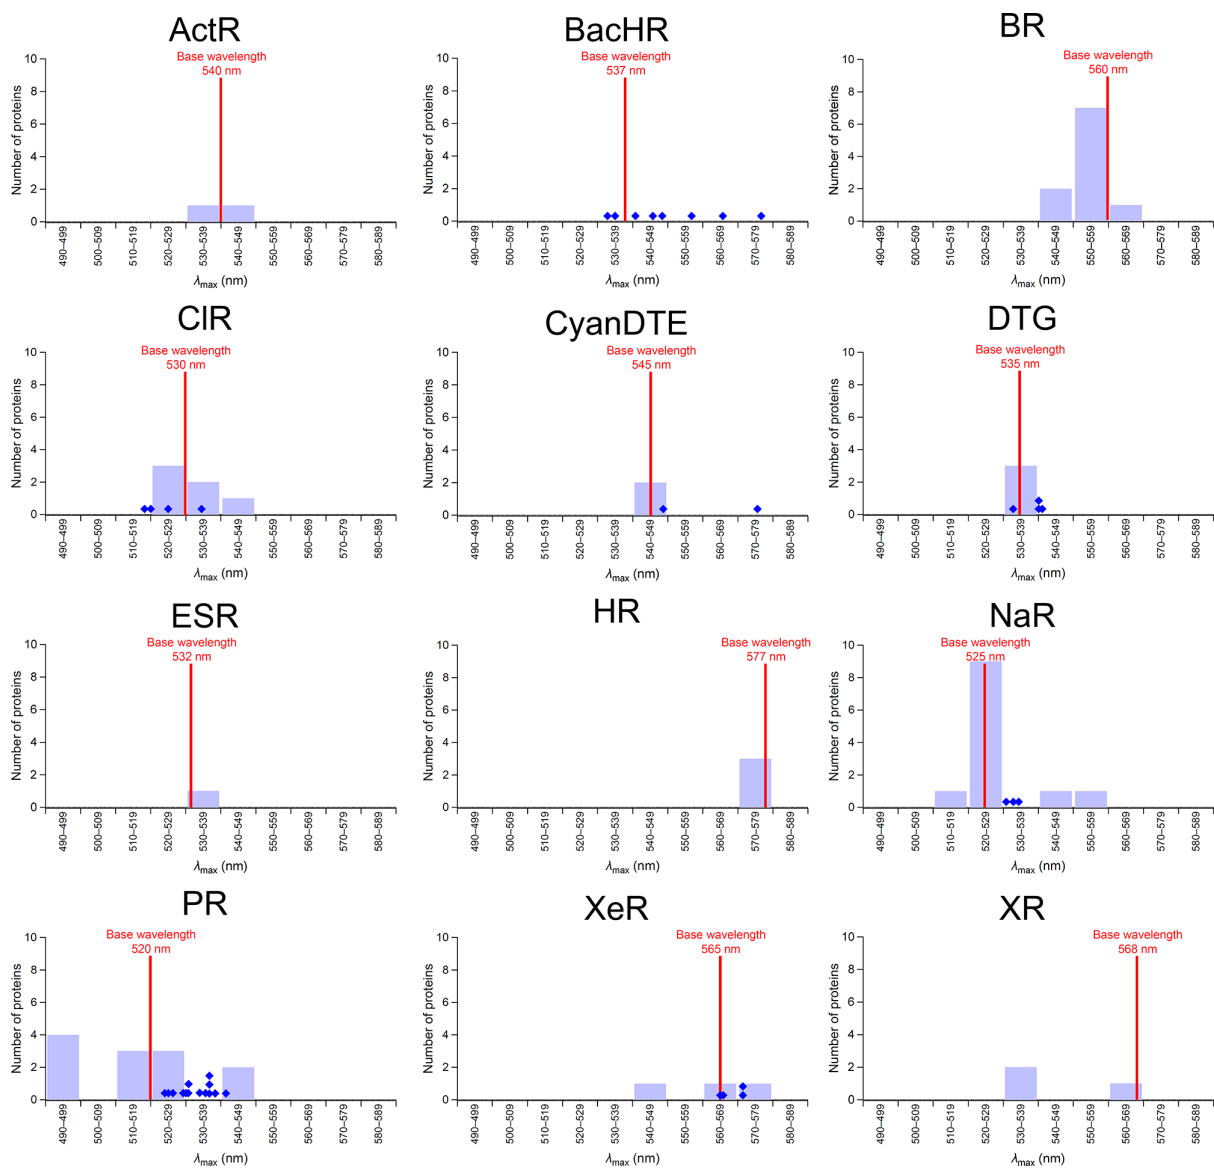

**Supplementary Figure 2. Distribution of  $\lambda_{\max}$  of wild-type microbial rhodopsins.**

Distribution of the number of microbial rhodopsins against their  $\lambda_{\max}$  (blue columns) for ion-pumping rhodopsin subfamilies. The base wavelengths of each subfamily and experimentally observed wavelength obtained in this study were indicated by red lines and blue diamonds, respectively. Since  $\lambda_{\max}$  of BacHR was not reported when we had constructed the training data, the distribution of the number of BacHRs against their  $\lambda_{\max}$  cannot be shown. Then,  $\lambda_{\max}$  of the first BacHR from cyanobacterium *Mastigocladopsis repens* was reported at 537 nm (Hasemi et al. *J. Biol. Chem.* (2016) 291, pp. 355–362)), and it was set to the base wavelength of BacHRs.
