# Supplementary material for: Exploration of natural red-shifted rhodopsins using a machine learning-based Bayesian experimental design
Source: PubMed Central journal article supplement (PMC7979833; doi:10.1038/s42003-021-01878-9), 2021-03-19
Supplement: 42003_2021_1878_MOESM2_ESM.pdf [file 42003_2021_1878_MOESM2_ESM.pdf]

## Description of Additional Supplementary Files

**File name:** Supplemental Data 1

**Description:** Database for training the machine-learning model. Amino-acid sequences and the absorption wavelengths of 884 wild-type microbial rhodopsins and their variants are given.

**File name:** Supplementary Data 2

**Description:** The list of amino acid physicochemical features used as inputs in the ML model

**File name:** Supplementary Data 3

**Description:** The list of subfamilies and the base wavelengths of microbial rhodopsins.

**File name:** Supplementary Data 4

**Description:** The list of predicted red-shift gains of 3,022 genes. We selected 65 genes whose expected gains were  $> 10$  nm. Note that, to synthesize a variety of genes, we randomly selected one representative among genes having identical amino acid sequences on the 24 retinal-surrounding residues.

**File name:** Supplementary Data 5

**Description:** The list of expected gains and observed gains of the selected 65 genes.

**File name:** Supplementary Data 6

**Description:** Amino acid residues at the color-tuning positions. The amino acid residues at the color-tuning positions corresponding to BR Leu93, Pro189, and Ala215.

**File name:** Supplementary Data 7

**Description:** The entire transformed datasets with physicochemical features.

**File name:** Supplementary Data 8

**Description:** The trained model parameters.

**File name:** Supplementary Data 9

**Description:** The source data underlying Fig. 4, 6a, 6b, 7a, and 7b.
